# Supplementary material for: Enhanced conversion efficiency of flexible dye-sensitized solar cells by optimization of the nanoparticle size with an electrophoretic deposition technique
Source: Royal Society of Chemistry journal article supplement (doi:10.1039/c2ra20542d), 2012-01-01
Supplement: c2ra20542d.pdf [file c2ra20542d.pdf]

## Supplementary Information

### Enhanced Conversion Efficiency for Flexible Dye-Sensitized Solar Cells by Optimization of Nanoparticle Size with Electrophoretic Deposition Technique

Zhaosheng Xue <sup>a,b</sup>, Wei Zhang <sup>a</sup>, Xiong Yin <sup>a,c</sup>, Yueming Cheng <sup>a</sup>, Long Wang <sup>a</sup>, Bin Liu <sup>a\*</sup>

<sup>a</sup> Department of Chemical and Biomolecular Engineering, National University of Singapore, Singapore 117576 E-mail: cheliub@nus.edu.sg

<sup>b</sup> NUS Graduate School for Integrative Sciences & Engineering (NGS), National University of Singapore, Singapore 117456

<sup>c</sup> National Center for Nanoscience and Technology, P.R. China

#### Table of Contents

**Table S1** Photovoltaic parameters of D149-sensitized solar cells fabricated from 10 nm nanoparticles on rigid glass substrate

**Table S2** Photovoltaic parameters of D149-sensitized solar cells fabricated from 14 nm nanoparticles on rigid glass substrate

**Table S3** Photovoltaic parameters of D149-sensitized solar cells fabricated from 19 nm nanoparticles on rigid glass substrate

**Table S4** Photovoltaic parameters of D149-sensitized solar cells fabricated from 27 nm nanoparticles on rigid glass substrate

**Table S5** Photovoltaic parameters of D149-sensitized solar cells fabricated from P25 nanoparticles on rigid glass substrate

**Figure S1** FESEM images of P25 films before and after compression

| Particle Size | Film Thickness ( $\mu\text{m}$ ) | Photovoltaic Properties <sup>a</sup> |                                         |      |            |
|---------------|----------------------------------|--------------------------------------|-----------------------------------------|------|------------|
|               |                                  | $V_{\text{oc}}$ (V)                  | $J_{\text{sc}}$ ( $\text{mA cm}^{-2}$ ) | FF   | $\eta$ (%) |
| 10 nm         | 4                                | 0.79                                 | 9.3                                     | 0.64 | 4.8        |
|               | 8                                | 0.77                                 | 10.6                                    | 0.64 | 5.3        |
|               | 11                               | 0.75                                 | 10.2                                    | 0.64 | 5.1        |
|               | 15                               | 0.75                                 | 10.1                                    | 0.64 | 4.9        |

<sup>a</sup> measured under AM 1.5G ( $100 \text{ mWcm}^{-2}$ );

**Table S1** Photovoltaic parameters of D149-sensitized solar cells fabricated from 10 nm nanoparticles on rigid glass substrate

| Particle Size | Film Thickness ( $\mu\text{m}$ ) | Photovoltaic Properties <sup>a</sup> |                                         |      |            |
|---------------|----------------------------------|--------------------------------------|-----------------------------------------|------|------------|
|               |                                  | $V_{\text{oc}}$ (V)                  | $J_{\text{sc}}$ ( $\text{mA cm}^{-2}$ ) | FF   | $\eta$ (%) |
| 14 nm         | 4                                | 0.80                                 | 6.2                                     | 0.65 | 3.2        |
|               | 8                                | 0.79                                 | 10.7                                    | 0.63 | 5.4        |
|               | 11                               | 0.78                                 | 10.9                                    | 0.63 | 5.3        |
|               | 15                               | 0.77                                 | 10.5                                    | 0.63 | 5.3        |

<sup>a</sup> measured under AM 1.5G ( $100 \text{ mWcm}^{-2}$ );

**Table S2** Photovoltaic parameters of D149-sensitized solar cells fabricated from 14 nm nanoparticles on rigid glass substrate

| Particle Size | Film Thickness ( $\mu\text{m}$ ) | Photovoltaic Properties <sup>a</sup> |                                         |      |            |
|---------------|----------------------------------|--------------------------------------|-----------------------------------------|------|------------|
|               |                                  | $V_{\text{oc}}$ (V)                  | $J_{\text{sc}}$ ( $\text{mA cm}^{-2}$ ) | FF   | $\eta$ (%) |
| 19 nm         | 4                                | 0.81                                 | 10.6                                    | 0.65 | 5.3        |
|               | 8                                | 0.79                                 | 12.4                                    | 0.65 | 6.2        |
|               | 11                               | 0.79                                 | 14.3                                    | 0.65 | 7.0        |
|               | 15                               | 0.78                                 | 10.7                                    | 0.65 | 5.6        |

<sup>a</sup> measured under AM 1.5G ( $100 \text{ mWcm}^{-2}$ );

**Table S3** Photovoltaic parameters of D149-sensitized solar cells fabricated from 19 nm nanoparticles on rigid glass substrate

| Particle Size | Film Thickness ( $\mu\text{m}$ ) | Photovoltaic Properties <sup>a</sup> |                                         |      |            |
|---------------|----------------------------------|--------------------------------------|-----------------------------------------|------|------------|
|               |                                  | $V_{\text{oc}}$ (V)                  | $J_{\text{sc}}$ ( $\text{mA cm}^{-2}$ ) | FF   | $\eta$ (%) |
| 27 nm         | 4                                | 0.85                                 | 8.6                                     | 0.68 | 4.5        |
|               | 8                                | 0.85                                 | 9.0                                     | 0.68 | 4.7        |
|               | 11                               | 0.84                                 | 9.2                                     | 0.68 | 5.3        |
|               | 15                               | 0.83                                 | 8.0                                     | 0.63 | 4.1        |

<sup>a</sup> measured under AM 1.5G ( $100 \text{ mWcm}^{-2}$ );

**Table S4** Photovoltaic of D149-sensitized solar cells fabricated from 27 nm nanoparticles on rigid glass substrate

| Particle    | Film Thickness ( $\mu\text{m}$ ) | Photovoltaic Properties <sup>a</sup> |                                  |      |            |
|-------------|----------------------------------|--------------------------------------|----------------------------------|------|------------|
|             |                                  | $V_{oc}$ (V)                         | $J_{sc}$ ( $\text{mA cm}^{-2}$ ) | FF   | $\eta$ (%) |
| Degussa P25 | 4                                | 0.80                                 | 7.0                              | 0.65 | 3.7        |
|             | 8                                | 0.79                                 | 9.4                              | 0.65 | 4.9        |
|             | 11                               | 0.77                                 | 12.7                             | 0.64 | 6.3        |
|             | 15                               | 0.75                                 | 10.0                             | 0.64 | 4.9        |

<sup>a</sup> measured under AM 1.5G ( $100 \text{ mWcm}^{-2}$ );

**Table S5** Photovoltaic parameters of D149-sensitized solar cells fabricated from P25 nanoparticles on rigid glass substrate

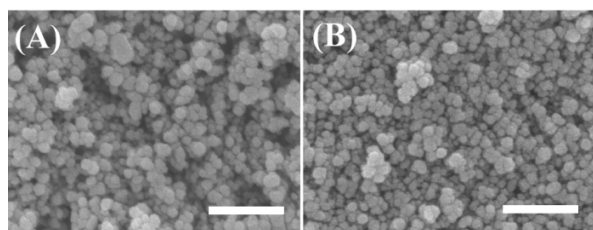

**Fig S1.** FESEM images of the P25 film prepared by EPD (A) ~ as prepared. (B) ~ after compression. Scale bar represents 100 nm
